# Supplementary material for: In vitro study: methylene blue-based antibacterial photodynamic inactivation of Pseudomonas aeruginosa
Source: Springer Nature journal article supplement (doi:10.1007/s00253-024-13009-5), 2024-01-23
Supplement: MOESM1 [file 253_2024_13009_MOESM1_ESM.pdf]

**Journal:** Applied Microbiology and Biotechnology

**In vitro study: methylene blue-based antibacterial photodynamic inactivation of  
*Pseudomonas aeruginosa***

Laiq Zada<sup>1,2</sup>, Shahzad Anwar<sup>2\*</sup>, Sana Imtiaz<sup>2</sup>, Muhammad Saleem<sup>2</sup>, Aamer Ali Shah<sup>1\*</sup>

<sup>1</sup>Department of Microbiology, Quaid-i-Azam University, 45320, Islamabad, Pakistan.

<sup>2</sup>National Institute of Lasers and Optonics College, Pakistan Institute of Engineering and Applied Sciences, Nilore, Islamabad 45650, Pakistan.

**\*Corresponding authors**

**Shahzad Anwar**, Ph.D.: Agri& Biophotonics Laboratory, National Institutes of Lasers and Optonics, Islamabad, Pakistan.

**Email:** Shahzadanwar112@yahoo.com

**Aamer Ali Shah**, Ph.D.: Applied Environmental and Geo-Microbiology Lab, Department of Microbiology, Quaid-i-Azam University, Islamabad, Pakistan.

**Email:** alishah@qau.edu.pk

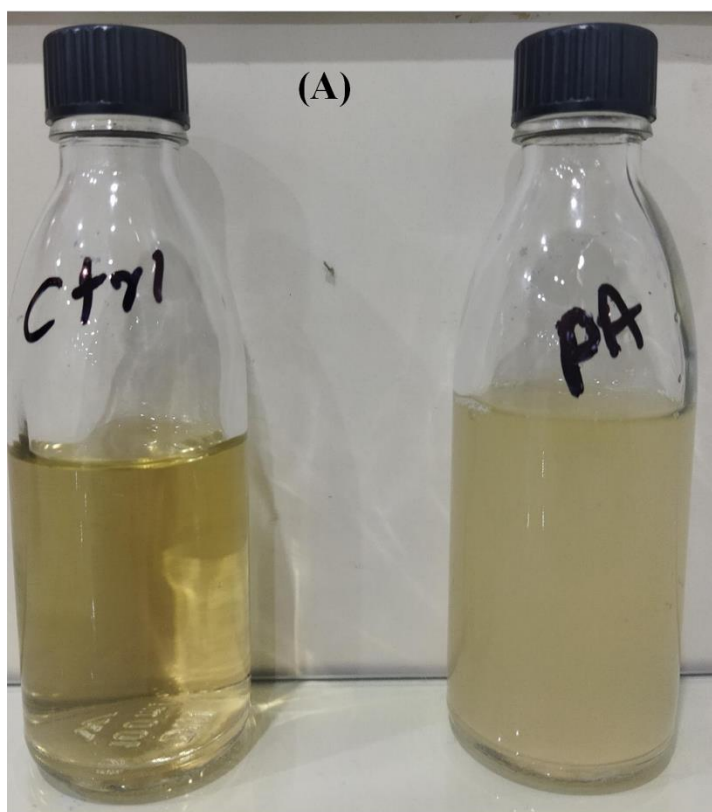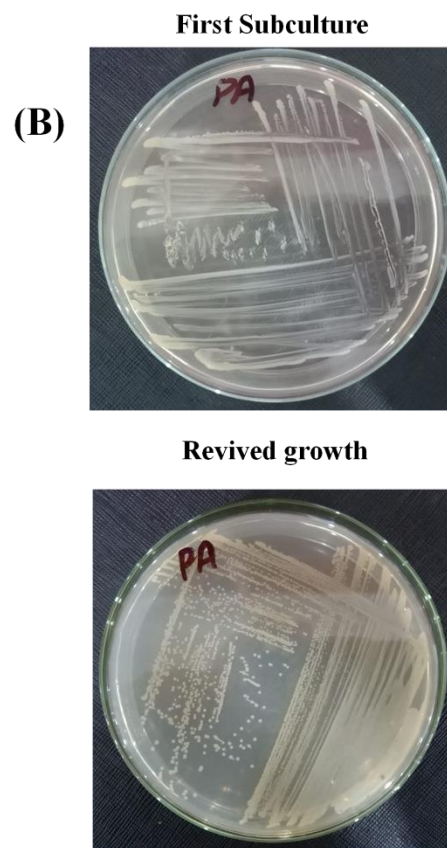

**Figure S1: Preparation and purification of bacterial strain. (a)** Inoculation of *Pseudomonas aeruginosa* in nutrient broth. **(b)** Revival of bacterial strain on nutrient agar.

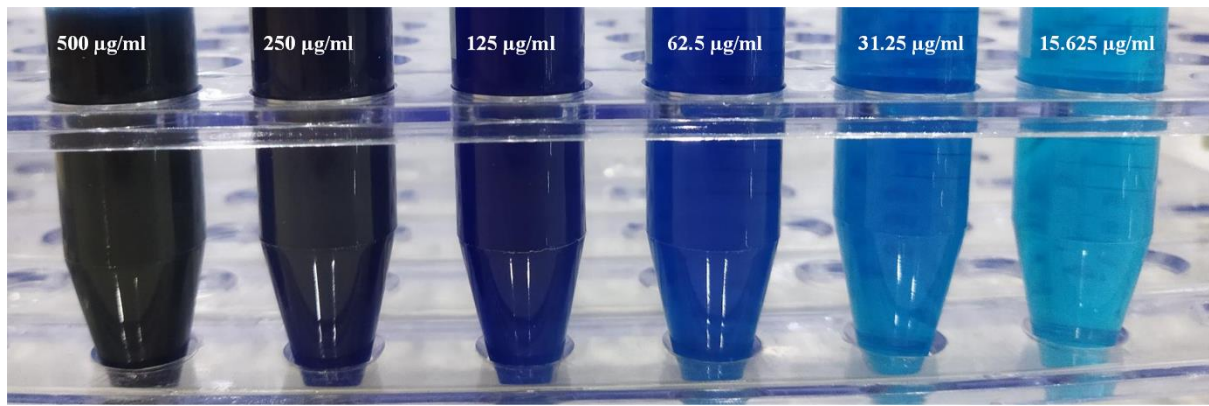

44

45 **Figure S2:** Methylene blue preparation from a stock solution in µg/ml concentrations for  
46 aPDT application
